# Supplementary material for: Evaluating the Protective Effects of Calcium Carbonate Coating on Sandstone Cultural Heritage
Source: MDPI journal article supplement (doi:10.3390/coatings11121534), 2021-12-14
Supplement: s1 [file s1]

Archive with 1 entries (1 files):
- coatings-1413025-supplementary.pdf
